# Supplementary material
Source: HighWire-hosted journal article supplement (https://www.ajnr.org/highwire/filestream/52718/field_highwire_adjunct_files/0/15-00205.pdf)
Supplement: 15-00205.pdf [file 15-00205.pdf]

**On-line Table: DCE-MRI studies in HNC with quantitative analysis**

| Study                                 | Sequence/TR                                | TI Mapping | Quantitative Model  | Assessed                                                                                                                                                                     | Outcome                                                                                                                                                                                                                                                                                                                                                       |
|---------------------------------------|--------------------------------------------|------------|---------------------|------------------------------------------------------------------------------------------------------------------------------------------------------------------------------|---------------------------------------------------------------------------------------------------------------------------------------------------------------------------------------------------------------------------------------------------------------------------------------------------------------------------------------------------------------|
| Van Cann et al, 2008 <sup>49</sup>    | 2D TI FLASH/2 sec                          | No         | Larsson model       | Preoperative assessment of mandibular invasion in 25 patients with SCC adjacent or fixed to mandible                                                                         | SCC with medullary invasion has higher mean $K_{ep}$ and $K^{trans}$ compared with SCC without medullary invasion                                                                                                                                                                                                                                             |
| Newbold et al, 2009 <sup>46</sup>     | 3D TI/6.4 sec                              | No         | Tofts model         | Pretreatment assessment of tumor hypoxia in 7 patients with HNC                                                                                                              | Positive correlation of $K^{trans}$ , $K_{ep}$ , and negative correlation of $V_e$ with tumor hypoxia (detected by pimonidazole staining of tumor specimen)                                                                                                                                                                                                   |
| Kim S et al, 2010 <sup>65</sup>       | 3D TI FSPGR/2.5 sec                        | Yes        | Shutter-speed model | Predicting treatment response by measuring $K^{trans}$ , $V_{e^*}$ , and TI in 33 patients with HNC before CRT                                                               | $K^{trans}$ was significantly higher in responders compared with nonresponders; $V_e$ and TI were not significantly different between the 2 groups                                                                                                                                                                                                            |
| Jansen et al, 2010 <sup>61</sup>      | 2D TI FSPGR/3.75–7.5 sec                   | No         | Tofts model         | Relationship between pretreatment $K^{trans}$ and $V_e$ in 13 patients with newly diagnosed HNC with tumor hypoxia in metastatic nodes measured by <sup>18</sup> F FMISO PET | Significantly lower $K^{trans}$ and $K_{ep}$ (poor perfusion) correlate with FMISO uptake in metastatic lymph nodes, suggesting moderate-to-severe tumor hypoxia                                                                                                                                                                                              |
| Chawla et al, 2011 <sup>27</sup>      | 3D TI SPGR/2.5 sec                         | No         | Shutter-speed model | Predicting disease-free survival in 57 patients with HNC using pretreatment $K^{trans}$ of the largest metastatic lymph node                                                 | Patients with prolonged disease-free survival have higher median $K^{trans}$ ( $\geq 0.41/\text{min}$ ) compared with patients with low $K^{trans}$ values                                                                                                                                                                                                    |
| Chikui et al, 2011 <sup>28</sup>      | 3D TI FFE/3.5 sec                          | No         | Brix model          | Predicting and monitoring treatment response in 20 patients with oral cancer by measuring TA, AH, $K_{ep^*}$ , and $K_{el}$ both pre- and post-CRT                           | Low AH before CRT suggests high possibility of good treatment response, and large increase in AH posttreatment correlates with good response                                                                                                                                                                                                                  |
| Chikui et al, 2012 <sup>45</sup>      | 3D TI FFE/3.5 sec                          | Yes        | Tofts model         | Predicting and monitoring treatment response in 29 patients with oral cancer by measuring $K^{trans}$ , $K_{ep^*}$ , $V_{e^*}$ , and AUGC both pre- and post-CRT             | <b>Pre-CRT:</b> no significant difference between the responders and nonresponders<br><b>Post-CRT:</b> $V_e$ and AUGC were significantly lower in low-grade tumors (grade I/IIa) compared with higher grade (grade IIb/III/IV). <b>Pre and post-CRT:</b> comparison: significant elevation of $K^{trans}$ and $V_e$ in responders compared with nonresponders |
| Agrawal et al, 2012 <sup>41</sup>     | 3D TI SPGR/5.25 sec                        | Yes        | Tofts model         | Pretreatment assessment of BV and BF in 21 patients with HNC for predicting treatment response                                                                               | BV and BF were significantly higher in responders versus partial responders                                                                                                                                                                                                                                                                                   |
| Shukla-Dave et al, 2012 <sup>29</sup> | 3D TI SPGR/3.75–7.5 sec                    | No         | Tofts model         | Predicting progression-free survival and overall survival in 74 patients with HNC                                                                                            | Skewness of $K^{trans}$ is the strongest predictor of progression-free and overall survival in patients with stage IV HNC with nodal disease                                                                                                                                                                                                                  |
| Wang et al, 2012 <sup>30</sup>        | 3D TI gradient-echo pulse sequence/7.6 sec | No         | Tofts model         | Predicting treatment response in 32 patients with HNC by measuring BV and BF before and at 2 weeks after CRT                                                                 | Large poorly perfused subvolumes of primary or nodal HNC before treatment and persisting during the early course (at 2 weeks) of CRT have the potential for prediction of local or regional failure                                                                                                                                                           |

**On-line Table: Continued**

| Study                            | Sequence/TR              | T1 Mapping | Quantitative Model        | Assessed                                                                                                                                                                            | Outcome                                                                                                                                                                                                                                                                                                |
|----------------------------------|--------------------------|------------|---------------------------|-------------------------------------------------------------------------------------------------------------------------------------------------------------------------------------|--------------------------------------------------------------------------------------------------------------------------------------------------------------------------------------------------------------------------------------------------------------------------------------------------------|
| Jansen et al, 2012 <sup>60</sup> | 2D TI FSPGR/4–5–9 sec    | No         | Tofts model               | Correlate <sup>1</sup> H-MRS, DCE-MRI, and FDG PET of 16 patients with HNC with nodal metastasis for assessment of tumor biology and in predicting short-term response to treatment | Significant positive correlation between Cho/W and TLG; negative correlation between Cho/W and SD of $V_e$ and $K_{ep}$ ; SUV <sub>max</sub> correlated with MRI tumor volume; SD of $K^{trans}$ and SUV <sub>mean</sub> correlated with short-term (3–4 month) response of HNC                        |
| Jansen et al, 2012 <sup>75</sup> | 2D TI FSPGR/3.75–7.5 sec | No         | Tofts model               | Correlate <sup>1</sup> H-MRS and DCE-MRI in 12 patients with nodal metastasis from HNC with specific molecular marker                                                               | Significant correlation between SD of $K_{ep}$ with VEGF IHC expression (endogenous marker for tumor vessel growth) and SD of $K^{trans}$ and SD of $V_e$ inversely correlated with Ki-67 IHC expression (reflecting cellular proliferation)                                                           |
| Chawla et al, 2013 <sup>26</sup> | 3D TI SPGR/2.5 sec       | No         | Generalized kinetic model | Predicting treatment response in 24 patients with HNSCC using $K^{trans}$ , $V_e$ , $V_p$ , and ADC of both primary tumor and metastatic lymph node                                 | Primary tumor: no significant difference of $K^{trans}$ , $V_p$ , ADC, and $V_e$ between the responders and nonresponders<br>Metastatic node: significantly higher $K^{trans}$ in responders compared with nonresponders; $V_p$ , ADC, and $V_e$ were not significantly different between the 2 groups |

**Note:**—TR indicates temporal resolution; TA, contrast arrival time; BV, blood volume; BF, blood flow; CRT, chemoradiation treatment; <sup>18</sup>F FMISO PET, <sup>18</sup>F fluorimisonidazole PET; Cho/W, total lesion glycolysis; SUV, standard uptake value; VEGF, vascular endothelial growth factor; IHC, immunohistochemical; Ti, intracellular water lifetime; SCC, squamous cell carcinoma; AUGC, area under the gadolinium dynamic curve; SPGR, spoiled gradient-recalled echo; HNSCC, head and neck squamous cell carcinoma; FSPGR, fast-spoiled gradient recalled; FFE, fast-field echo; AH, amplitude of the normalized dynamic curve;  $K_{ep}$ , elimination rate constant.
